# Supplementary material for: A co-assembly process for high strength and injectable dual network gels with sustained doxorubicin release performance
Source: Royal Society of Chemistry journal article supplement (doi:10.1039/d3sm01763j), 2024-01-01
Supplement: d3sm01763j1.pdf [file d3sm01763j1.pdf]

# SI

## A co-assembly process for a high strength and injectable dual network gel with sustained doxorubicin release performance

Chengcheng Zhao<sup>1,2</sup>, Yanyao Wang<sup>2</sup>, Lin Wang<sup>3</sup>, Shuwen Lou<sup>4</sup>, Bofang Shi<sup>2</sup>, Yongfang Rao<sup>\*2</sup>,  
Mingtao Li<sup>2</sup>, Wei Yan<sup>2</sup>, Honghui Yang<sup>\*1</sup>

1. Xi'an Key Laboratory of Sustainable Energy Materials Chemistry; School of Chemistry, Xi'an Jiaotong University, Xi'an 710049, China;
2. State Key Laboratory of Multiphase Flow in Power Engineering; Department of Environmental Science and Engineering, Xi'an Jiaotong University, Xi'an 710049, China;
3. First Affiliate Hospital of Xi'an Jiaotong University, Xi'an Jiaotong University, Xi'an 710049, China;
4. Hangzhou Entel Foreign Language School, Hangzhou 311122, China.

\* Corresponding authors: yf rao@xjtu.edu.cn (Yongfang Rao); yanghonghui@mail.xjtu.edu.cn (Honghui Yang)

**Table S1** The collected FTIR peak information of gels

| Wavenumber / cm <sup>-1</sup> | Vibration modes                                                      |
|-------------------------------|----------------------------------------------------------------------|
| 3600                          | $\nu(-\text{CONH}-)$                                                 |
| 3317                          | $\nu(-\text{COOH}, \text{H-bond})$                                   |
| 3456                          | $\nu(-\text{OH}, -\text{COOH}, \text{H-bond})$                       |
| 3063                          | $\nu(\text{Aryl-H})$                                                 |
| 1725                          | $\nu(-\text{COO-Fmoc}, -\text{CONH}-(\text{Amide I}), -\text{COOH})$ |
| 1687                          | $\gamma(-\text{OH})$                                                 |
| 1633                          | $\nu_{\text{as}}(\text{G-COOH}, \text{M-COOH})$                      |
| 1610                          | $\beta\text{-sheet}, \nu_{\text{as}}(-\text{COO}-)$                  |
| 1538                          | $\nu(\text{Fmoc}, \text{Bz})$                                        |
| 1450                          | $\gamma(-\text{CONH}-)$ Amide II                                     |
| 1432                          | $\nu_{\text{s}}(\text{G-COOH}, \text{M-COOH})$                       |
| 1395                          | $\nu(-\text{CONH}-)$ Amide III                                       |
| 1256                          | $\nu(-\text{OCO-Fmoc})$                                              |
| 1080                          | $\nu(-\text{CONH}-)$                                                 |
| 1024                          | $\nu(-\text{COOOC}-)$                                                |
| 740                           | $\beta(\text{Aryl-H})$                                               |
| 563                           | $\beta(-\text{CH}_2-)$                                               |

**Table S2** The collected data of ORCA calculation: the geometry optimization at B97-3C level, the single point energy at RI-B97M-V/def2-TZVP level and the binding energy ( $\Delta E$ ).

| Conformation                         | Single point energy (SPE) / a.u. | $\Delta E$ / (kcal/mol) |
|--------------------------------------|----------------------------------|-------------------------|
| <b>Fmoc-F</b>                        | -1282.960                        | \                       |
| <b>ALG</b>                           | -1446.194                        | \                       |
| <b>DOX</b>                           | -1928.674                        | \                       |
| <b>Fmoc-F·Fmoc-F (1)</b>             | -2565.940                        | -12.613                 |
| <b>Fmoc-F·Fmoc-F (2)</b>             | -2565.943                        | -14.478                 |
| <b>Fmoc-F·H<sub>2</sub>O·Fmoc-F</b>  | -2642.395                        | -28.964                 |
| <b>Fmoc-F·2H<sub>2</sub>O·Fmoc-F</b> | -2718.842                        | -39.275                 |
| <b>Fmoc-F·ALG (1)</b>                | -2729.175                        | -13.217                 |
| <b>Fmoc-F·ALG (2)</b>                | -2729.198                        | -27.684                 |
| <b>ALG·ALG</b>                       | -2892.429                        | -25.777                 |
| <b>ALG·Ca·ALG</b>                    | -3570.168                        | -157.837                |
| <b>Fmoc-F·DOX (1)</b>                | -3211.668                        | -21.847                 |
| <b>Fmoc-F·DOX (2)</b>                | -3211.669                        | -22.393                 |
| <b>ALG·DOX (1)</b>                   | -3374.919                        | -31.661                 |
| <b>ALG·DOX (2)</b>                   | -3374.906                        | -24.349                 |
| <b>DOX·DOX (1)</b>                   | -3857.393                        | -28.896                 |
| <b>DOX·DOX (2)</b>                   | -3857.384                        | -22.750                 |
| <b>Fmoc-F·DOX·ALG (1)</b>            | -4657.909                        | -50.982                 |
| <b>Fmoc-F·DOX·ALG (2)</b>            | -4657.912                        | -53.021                 |

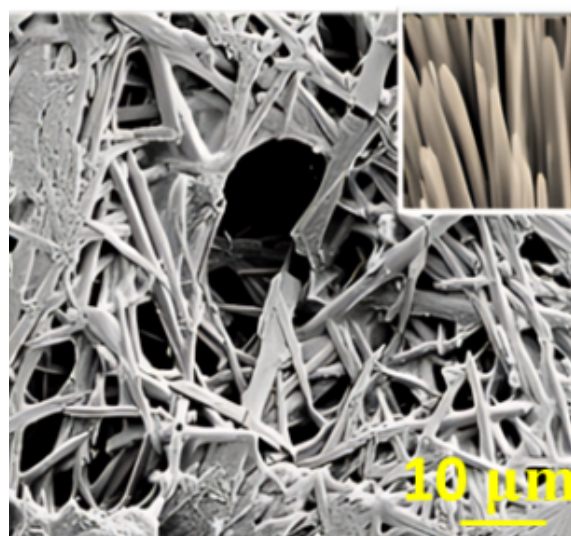

**Figure S1** The network morphology overview of 1<sup>st</sup>SN

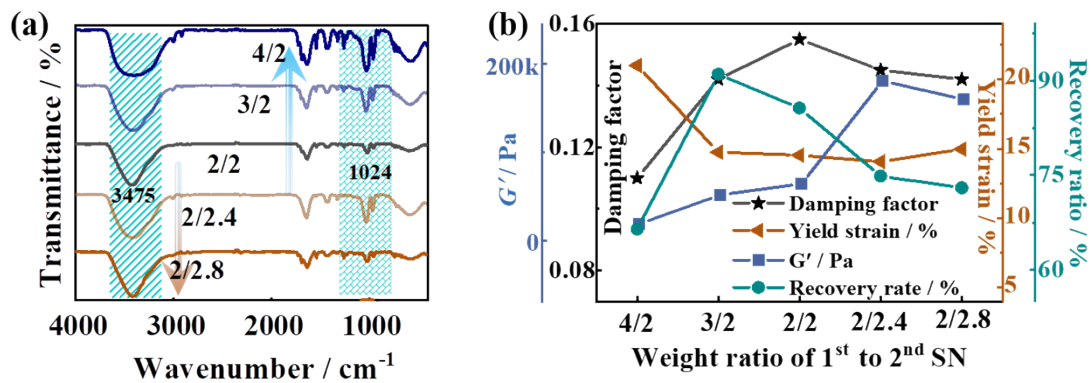

**Figure S2** The dependency of DN gel properties on 1<sup>st</sup>SN/2<sup>nd</sup>SN ratio: (a) FTIR spectra and (b) rheological parameter's comparison.

**Table S3** The collected rheological information of SN and DN gels.

| The weight ratio of<br>1 <sup>st</sup> SN to 2 <sup>nd</sup> SN | Strain sweep     |                   |                     |              | 3ITT                              |
|-----------------------------------------------------------------|------------------|-------------------|---------------------|--------------|-----------------------------------|
|                                                                 | $G' / \text{Pa}$ | $G'' / \text{Pa}$ | Yield<br>strain / % | $\tan\delta$ | Recover ratio<br>within 100 s / % |
| 4/2                                                             | 18700            | 2060              | 21.00               | 0.110        | 66.46                             |
| 3/2                                                             | 51700            | 7330              | 14.75               | 0.142        | 91.01                             |
| 2/2                                                             | 64400            | 9960              | 14.53               | 0.155        | 85.63                             |
| 2/2.4                                                           | 181000           | 26200             | 14.07               | 0.145        | 74.87                             |
| 2/2.8                                                           | 160000           | 22700             | 14.97               | 0.142        | 73.01                             |

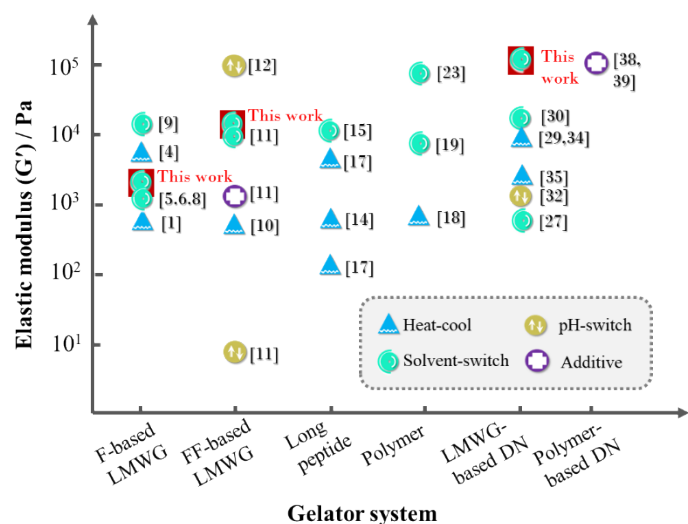

**Figure S3** The comparison of elastic modulus of gels in this work and other types of gel materials.

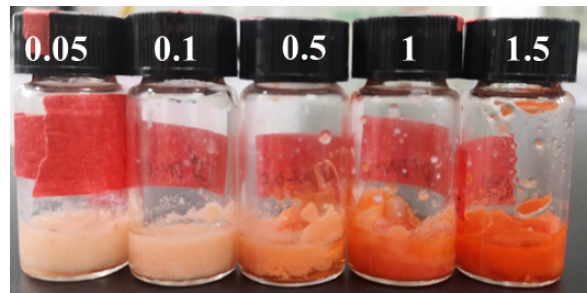

**Figure S4** The optical pictures of DN-DOX-X gels with different DOX amounts (X=0.05, 0.1, 0.5, 1 and 1.5).

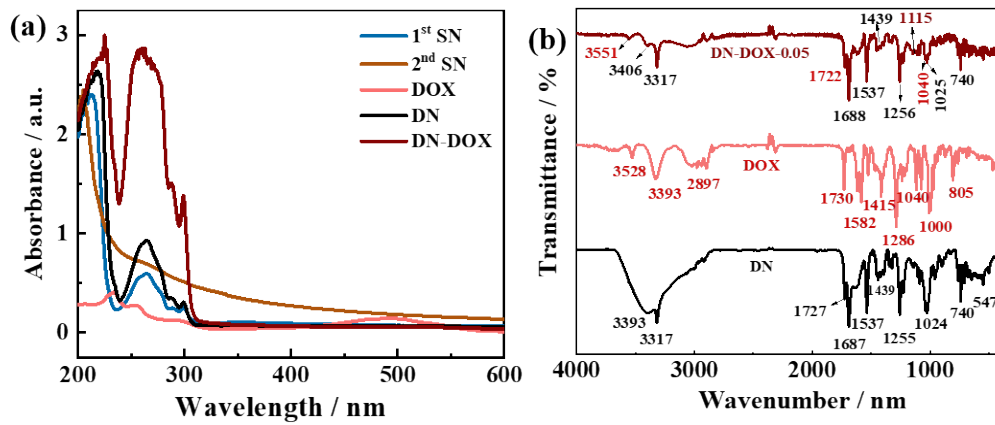

**Figure S5** The structural change before and after DOX loading: (a) the UV-vis spectra, (b) FTIR spectra.

**Table S4** The collecting rheological data of DN-DOX gels.

| Sample      | Strain sweep |            | 3ITT             |                   |
|-------------|--------------|------------|------------------|-------------------|
|             | $G'$ / Pa    | $G''$ / Pa | Yield strain / % | Recover ratio / % |
| DN-DOX-0.05 | 35600        | 6420       | 8.46             | 84.10             |
| DN-DOX-0.1  | 57400        | 7190       | 14.29            | 89.60             |
| DN-DOX-0.5  | 108000       | 13300      | 17.68            | 84.88             |
| DN-DOX-1    | 60100        | 8350       | 16.88            | 88.53             |
| DN-DOX-1.5  | 51800        | 8210       | 21.45            | 87.55             |

**Table S5** The DOX loading efficiency, encapsulation efficiency and releasing in DN-DOX gels.

| Drug delivery efficiency                      |                        | 1 <sup>st</sup> SN-DOX-0.05 | 2 <sup>nd</sup> SN-DOX-0.05 | DN-DOX-x    |             |             |             |             |             |
|-----------------------------------------------|------------------------|-----------------------------|-----------------------------|-------------|-------------|-------------|-------------|-------------|-------------|
|                                               |                        |                             |                             | 0.05        | 0.1         | 0.5         | 1           | 1.5         |             |
| Loading capacity                              | $E_l / \%$             | 0.10                        | 0.07                        | 0.12        | 0.24        | 1.20        | 2.22        | 3.26        |             |
|                                               | $E_e / \%$             | 77.06                       | 59.11                       | 96.71       | 95.48       | 97.47       | 90.65       | 89.77       |             |
| Releasing profile                             | $E_r$ at 30 min / %    | 16.57                       | 11.65                       | 2.34        | 3.35        | 5.48        | 11.88       | 10.00       |             |
|                                               | $E_r$ at 24 h / %      | /                           | /                           | 52.01       | 37.89       | 30.31       | 44.71       | 50.45       |             |
|                                               | t for $E_r > 50\% / h$ | 2                           | 2                           | 24          | 30          | 36          | 32          | 24          |             |
|                                               | t for $E_r > 90\% / h$ | 10                          | 10                          | 57          | 82          | 144         | 168         | 72          |             |
|                                               | Whole range            | $a$                         | 36.04                       | 35.47       | 12.28       | 11.16       | 9.94        | 18.40       | 26.58       |
| Fitting result of Er on a Rigter-Peppas model | $n$                    | <b>0.48</b>                 | <b>0.41</b>                 | <b>0.48</b> | <b>0.47</b> | <b>0.46</b> | <b>0.33</b> | <b>0.27</b> |             |
|                                               | $R^2$                  | 0.97                        | 0.90                        | 0.98        | 0.96        | 0.95        | 0.96        | 0.91        |             |
|                                               | 0~24h                  | $a_1$                       |                             |             | 11.46       | 9.25        | 8.18        | 20.11       | 21.42       |
|                                               |                        | $n_1$                       |                             | \           | <b>0.49</b> | <b>0.45</b> | <b>0.41</b> | <b>0.26</b> | <b>0.29</b> |
|                                               |                        | $R_1^2$                     |                             |             | 0.97        | 0.96        | 0.99        | 0.98        | 0.96        |
|                                               | 24~48h                 | $a_2$                       |                             |             | 6.07        | 4.29        | 1.61        | 5.27        | 7.88        |
|                                               |                        | $n_2$                       |                             |             | <b>0.67</b> | <b>0.74</b> | <b>0.96</b> | <b>0.56</b> | <b>0.62</b> |
|                                               |                        | $R_2^2$                     |                             |             | 0.96        | 0.97        | 0.98        | 0.99        | 0.90        |
|                                               | 48~End                 | $a_3$                       |                             |             | 42.60       | 34.19       | 23.34       | 38.25       | 69.58       |
| $n_2$                                         |                        |                             |                             | <b>0.19</b> | <b>0.22</b> | <b>0.28</b> | <b>0.17</b> | <b>0.06</b> |             |
| $R_3^2$                                       |                        |                             |                             | 0.72        | 0.82        | 0.97        | 0.88        | 0.84        |             |

**Table S6** The release kinetics fitting by other models

| Sample                      | Zero-order                             | First-order                                                        | Higuchi                                                         |
|-----------------------------|----------------------------------------|--------------------------------------------------------------------|-----------------------------------------------------------------|
| 1 <sup>st</sup> SN-DOX-0.05 | y=20.63+9.26x,<br>R <sup>2</sup> =0.83 | y=98.68 $\beta$ (1-e <sup>-0.35x</sup> ),<br>R <sup>2</sup> =0.99  | y=33.27 $\beta$ x <sup>1/2</sup> -0.03,<br>R <sup>2</sup> =0.97 |
| 2 <sup>nd</sup> SN-DOX-0.05 | y=26.51+1.09x,<br>R <sup>2</sup> =0.68 | y=94.44 $\beta$ (1-e <sup>-0.36x</sup> ),<br>R <sup>2</sup> =0.99  | y=27.72 $\beta$ x <sup>1/2</sup> +4.16,<br>R <sup>2</sup> =0.89 |
| 0.05                        | y=21.61+1.09x,<br>R <sup>2</sup> =0.87 | y=103.09 $\beta$ (1-e <sup>-0.03x</sup> ),<br>R <sup>2</sup> =0.97 | y=11.33 $\beta$ x <sup>1/2</sup> +0.08,<br>R <sup>2</sup> =0.97 |
|                             | y=24.20+0.77x,<br>R <sup>2</sup> =0.79 | y=102.77 $\beta$ (1-e <sup>-0.03x</sup> ),<br>R <sup>2</sup> =0.98 | y=9.82 $\beta$ x <sup>1/2</sup> -0.05,<br>R <sup>2</sup> =0.95  |
| DN-DOX-x                    | y=24.84+0.53x,<br>R <sup>2</sup> =0.77 | y=98.36 $\beta$ (1-e <sup>-0.02x</sup> ),<br>R <sup>2</sup> =0.98  | y=8.10 $\beta$ x <sup>1/2</sup> +1.17,<br>R <sup>2</sup> =0.94  |
|                             | y=35.65+0.44x,<br>R <sup>2</sup> =0.71 | y=90.02 $\beta$ (1-e <sup>-0.03x</sup> ),<br>R <sup>2</sup> =0.87  | y=6.82 $\beta$ x <sup>1/2</sup> +15.17,<br>R <sup>2</sup> =0.92 |
| 1.5                         | y=46.32+0.41x,<br>R <sup>2</sup> =0.52 | y=90.91 $\beta$ (1-e <sup>-0.05x</sup> ),<br>R <sup>2</sup> =0.91  | y=7.04 $\beta$ x <sup>1/2</sup> +23.33,<br>R <sup>2</sup> =0.81 |

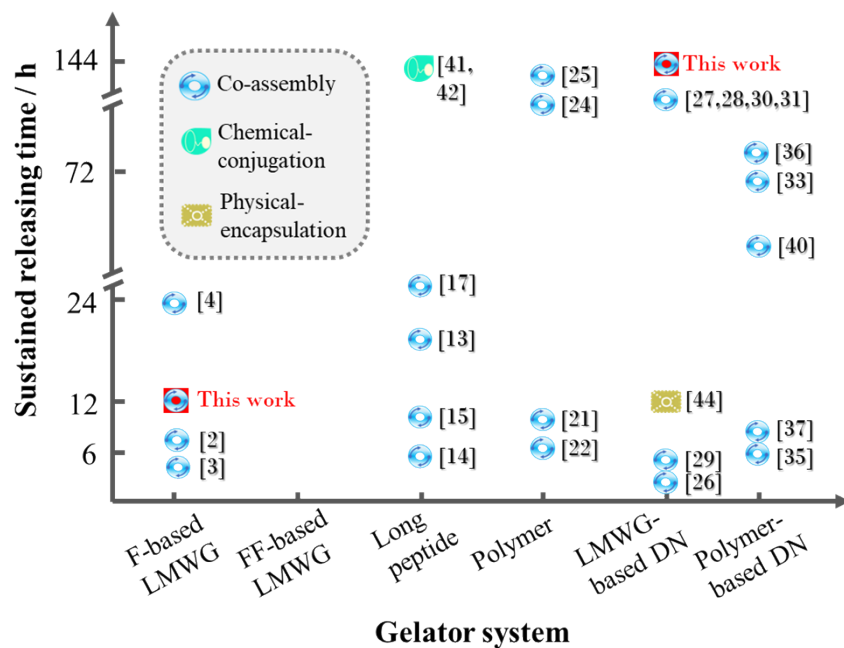

**Figure S6** The comparison of sustained releasing time of gels in this work and other types of gel materials.

**Reference:**

- [1] Murali DM, Shanmugam G. The aromaticity of the phenyl ring imparts thermal stability to a supramolecular hydrogel obtained from low molecular mass compound. *New J Chem*, 2019, 43 (31): 12396-12409.
- [2] Gahane AY, Ranjan P, Singh V, et al. Fmoc-phenylalanine displays antibacterial activity against Gram-positive bacteria in gel and solution phases. *Soft Matt*, 2018, 14 (12): 2234-2244.
- [3] Singh V, Snigdha K, Singh C, et al. Understanding the self-assembly of Fmoc-phenylalanine to hydrogel formation. *Soft Matt*, 2015, 11 (26): 5353-5364.
- [4] Snigdha K, Singh BK, Mehta AS, et al. Self-assembling N -(9-Fluorenylmethoxycarbonyl)-l-Phenylalanine hydrogel as novel drug carrier. *Int J Biol Macromol*, 2016, 93: 1639-1646.
- [5] Abraham JN, Joseph S, Trivedi R, et al. Injectable dextran-fluorenylmethoxycarbonyl phenylalanine composite hydrogels with improved mechanical properties. *Polym Int*, 2021, 70 (2): 222-229.
- [6] Ryan DM, Anderson SB, Nilsson BL. The influence of side-chain halogenation on the self-assembly and hydrogelation of Fmoc-phenylalanine derivatives. *Soft Matt*, 2010, 6 (14): 3220.
- [7] Ryan DM, Doran TM, Nilsson BL. Stabilizing self-assembled Fmoc-F5-Phe hydrogels by co-assembly with PEG-functionalized monomers. *Chem Commun (Camb)*, 2011, 47 (1): 475-477.
- [8] Hashemnejad SM, Huda MM, Rai N, et al. Molecular Insights into Gelation of Di-Fmoc-l-Lysine in Organic Solvent-Water Mixtures. *ACS Omega*, 2017, 2 (5): 1864-1874.
- [9] Zhang Y, Li S, Ma M, et al. Tuning of gel morphology with supramolecular chirality amplification using a solvent strategy based on an Fmoc-amino acid building block. *New J Chem*, 2016, 40 (6): 5568-5576.

- [10] Li J, Kuang Y, Shi J, et al. The conjugation of nonsteroidal anti-inflammatory drugs (NSAID) to small peptides for generating multifunctional supramolecular nanofibers/hydrogels. *Beilstein J Org Chem*, 2013, 9: 908-917.
- [11] Raeburn J, Zamith Cardoso A, Adams DJ. The importance of the self-assembly process to control mechanical properties of low molecular weight hydrogels. *Chem Soc Rev*, 2013, 42 (12): 5143-5156.
- [12] Najafi H, Abolmaali SS, Heidari R, et al. Nitric oxide releasing nanofibrous Fmoc-dipeptide hydrogels for amelioration of renal ischemia/reperfusion injury. *J Control Release*, 2021, 337: 1-13.
- [13] Howe EJ, Okesola BO, Smith DK. Self-assembled sorbitol-derived supramolecular hydrogels for the controlled encapsulation and release of active pharmaceutical ingredients. *Chem Commun (Camb)*, 2015, 51 (35): 7451-7454.
- [14] Yu A, Hu Y, Ma X, et al. Sequential drug release of co-assembled supramolecular hydrogel as synergistic therapy against *Staphylococcus aureus* endophthalmitis. *Chem Eng J*, 2022, 427: 130979.
- [15] Valls A, Isabel Burguete M, Kuret L, et al. Open chain pseudopeptides as hydrogelators with reversible and dynamic responsiveness to pH, temperature and sonication as vehicles for controlled drug delivery. *J Mol Liq*, 2021, 348: 118051.
- [16] Dadfar SMR, Pourmahdian S, Tehrani MM, et al. Novel dual-responsive semi-interpenetrating polymer network hydrogels for controlled release of anticancer drugs. *J Biomed Mater Res A*, 2019, 107 (10): 2327-2339.
- [17] Tao N, Li G, Liu M, et al. Preparation of dual responsive low-molecular-weight hydrogel for long-lasting drug delivery. *Tetrahedron*, 2017, 73 (22): 3173-3180.
- [18] Mo G, Zhang R, Wang Y, et al. Rheological and optical investigation of the gelation with and without phase separation in PAN/DMSO/H<sub>2</sub>O ternary blends. *Polymer*, 2016, 84: 243-253.
- [19] Appaw C, Gilbert RD, Khan SA, et al. Viscoelastic behavior of cellulose acetate in a mixed solvent system. *Biomacromolecules*, 2007, 8 (5): 1541-1547.
- [20] Gonzalez MV, Tang Y, Phillips GJ, et al. Doxorubicin eluting beads-2: methods for evaluating drug elution and in-vitro:in-vivo correlation. *J Mater Sci Mater Med*, 2008, 19 (2): 767-775.
- [21] Mao J, Qiu L, Ge L, et al. Overcoming multidrug resistance by intracellular drug release and inhibiting p-glycoprotein efflux in breast cancer. *Biomed Pharmacother*, 2021, 134: 111108.
- [22] Maciel D, Figueira P, Xiao S, et al. Redox-responsive alginate nanogels with enhanced anticancer cytotoxicity. *Biomacromolecules*, 2013, 14 (9): 3140-3146.
- [23] Ma M, Feng Z, Zhao M, et al. Fabrication of macrocyclic organogel utilizing solvent balance and its application in vascular supporting materials. *Colloid Surf*, 2020, 589: 124432.
- [24] Zhou Q, Li C, Guo J, et al. Self-assembled biocompatible heparin-based supramolecular hydrogel for doxorubicin delivery. *Carbohydr Res*, 2022, 511: 108464.
- [25] Wang M, Chen M, Niu W, et al. Injectable biodegradation-visual self-healing citrate hydrogel with high tissue penetration for microenvironment-responsive degradation and local tumor therapy. *Biomaterials*, 2020, 261: 120301.
- [26] Dou XQ, Zhao CL, Mehwish N, et al. Photoresponsive supramolecular hydrogel co-assembled from Fmoc-Phe-OH and 4,4'-azopyridine for controllable dye release. *Chinese J Polym Sci*, 2019, 37 (5): 437-443.
- [27] Chen J, Tao N, Fang S, et al. Incorporation of Fmoc-Y nanofibers into Ca-alginate hydrogels

- for improving their mechanical properties and the controlled release of small molecules. *New J Chem*, 2018, 42 (12): 9651-9657.
- [28] Shulman LP. Effectiveness of maternal influenza immunization in mothers and infants. *yearbook of obstetrics, gynecology and women's health. N Engl J Med*, 2009, 359: 115-117.
- [29] Grijalvo S, Puras G, Zárate J, et al. Nioplexes encapsulated in supramolecular hybrid biohydrogels as versatile delivery platforms for nucleic acids. *RSC Adv*, 2016, 6 (46): 39688-39699.
- [30] Huang R, Qi W, Feng L, et al. Self-assembling peptide–polysaccharide hybrid hydrogel as a potential carrier for drug delivery. *Soft Matt*, 2011, 7 (13): 6222.
- [31] Gallo E, Diaferia C, Rosa E, et al. Peptide-based hydrogels and nanogels for delivery of doxorubicin. *Int J Nanomedicine*, 2021, 16: 1617-1630.
- [32] Giuri D, Barbalinardo M, Zanna N, et al. Tuning mechanical properties of pseudopeptide supramolecular hydrogels by graphene doping. *Molecules*, 2019, 24 (23): 4345.
- [33] Bai J, Liu Y, Jiang X. Multifunctional PEG-GO/CuS nanocomposites for near-infrared chemophotothermal therapy. *Biomaterials*, 2014, 35 (22): 5805-5813.
- [34] Piras CC, Mahon CS, Smith DK. Self-assembled supramolecular hybrid hydrogel beads loaded with silver nanoparticles for antimicrobial applications. *Chem A Europ J*, 2020, 26 (38): 8452-8457.
- [35] Patterson AK, Smith DK. Two-component supramolecular hydrogel for controlled drug release. *Chem Commun (Camb)*, 2020, 56 (75): 11046-11049.
- [36] Vieira VMP, Hay LL, Smith DK. Multi-component hybrid hydrogels-understanding the extent of orthogonal assembly and its impact on controlled release. *Chem Sci*, 2017, 8 (10): 6981-6990.
- [37] Nanda J, Biswas A, Banerjee A. Single amino acid based thixotropic hydrogel formation and pH-dependent morphological change of gel nanofibers. *Soft Matt*, 2013, 9 (16): 4198.
- [38] Sun JY, Zhao X, Illeperuma WR, et al. Highly stretchable and tough hydrogels. *Nature*, 2012, 489 (7414): 133-136.
- [39] Chen Q, Zhu L, Chen H, et al. A novel design strategy for fully physically linked double network hydrogels with tough, fatigue resistant, and self-healing properties. *Adv Func Mater*, 2015, 25 (10): 1598-1607.
- [40] Zhang R, Xing R, Jiao T, et al. Carrier-free, chemophotodynamic dual nanodrugs via self-assembly for synergistic antitumor therapy. *ACS Appl Mater Interfaces*, 2016, 8 (21): 13262-13269.
- [41] Zhao D, Zhao X, Zu Y, et al. Preparation, characterization, and in vitro targeted delivery of folate-decorated paclitaxel-loaded bovine serum albumin nanoparticles. *Int J Nanomedicine*, 2010, 5: 669-677.
- [42] Yue Y, Liu ZW. Conjugating doxorubicin to supramolecular organic frameworks: polymeric prodrugs with enhanced therapeutic efficacy and safety. *J Mater Chem B*, 2022, 10(22): 4163-4171.
- [43] Gao Y, Chen Y, Ji X, et al. Controlled intracellular release of Doxorubicin in multidrug-resistant cancer cells by tuning the shell-pore sizes of mesoporous silica nanoparticles. *ACS Nano*, 2011, 5 (12): 9788-9798.
- [44] Ye W, Zhang G, Liu X, et al. Fabrication of polysaccharide-stabilized zein nanoparticles by flash nanoprecipitation for doxorubicin sustained release. 2022, 70: 103183.
